# Supplementary material for: Unsupervised Learning Based on Meibography Enables Subtyping of Dry Eye Disease and Reveals Ocular Surface Features
Source: PubMed Central journal article supplement — Invest Ophthalmol Vis Sci. 2023 Oct 26;64(13):43. doi: 10.1167/iovs.64.13.43 (PMC10615148; doi:10.1167/iovs.64.13.43), 2023-10-26
Supplement: iovs-64-13-43_s001.pdf [file iovs-64-13-43_s001.pdf]

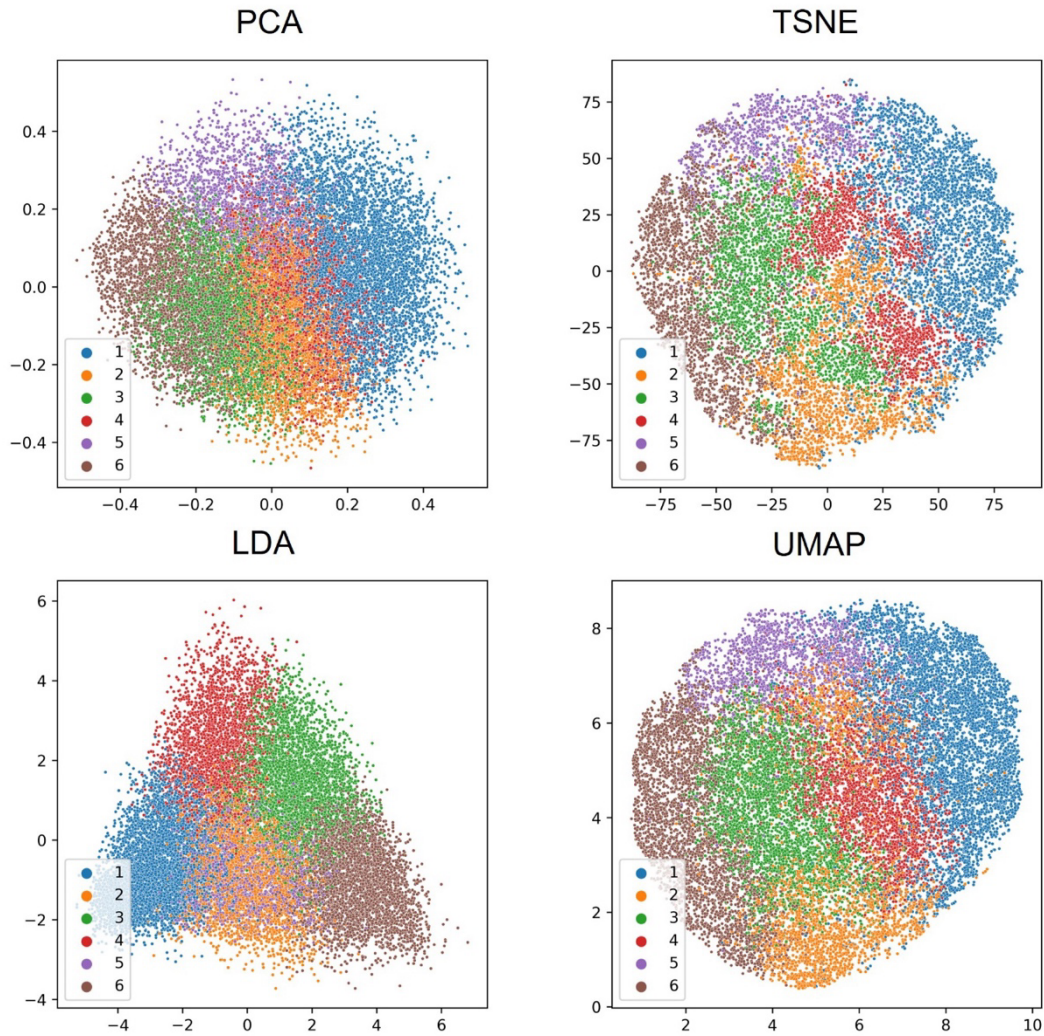

Supplementary Figure 1. Visualization of the embedding vectors obtained from SimCLR clustering using various dimensionality reduction techniques. The methods employed include PCA (Principal Component Analysis), t-SNE (t-Distributed Stochastic Neighbor Embedding), LDA (Linear Discriminant Analysis), and UMAP (Uniform Manifold Approximation and Projection).

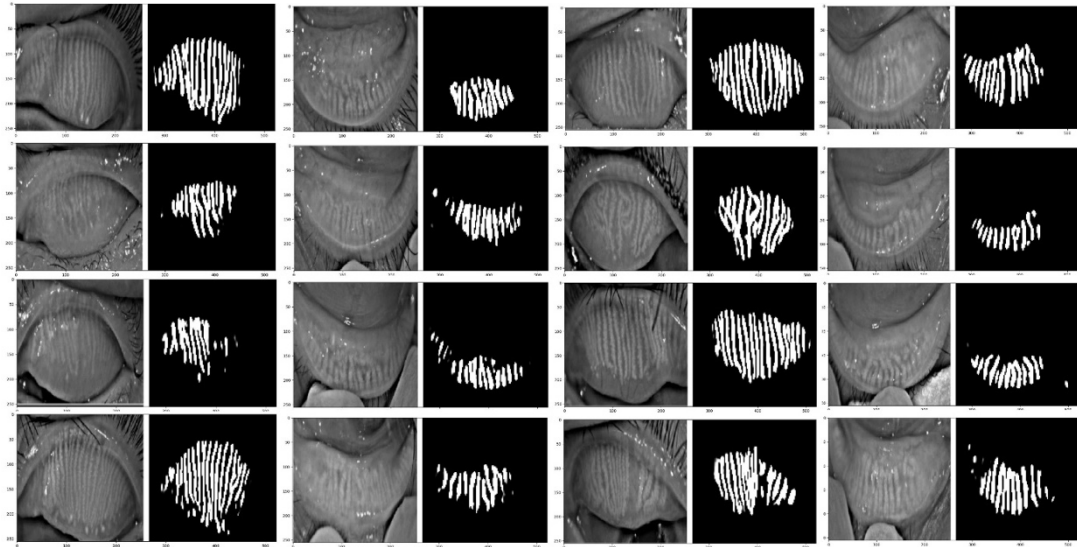

Supplementary Figure 2. Examples of meibomian glands segmented by G model.
